# Supplementary material for: General acid and base bifunctional graphene oxide for cooperative catalysis
Source: Royal Society of Chemistry journal article supplement (doi:10.1039/c4ta01446d), 2014-01-01
Supplement: c4ta01446d1.pdf [file c4ta01446d1.pdf]

## Electronic Supplementary Information

### General acid and base bifunctional graphene oxide for cooperative catalysis

Wenfeng Zhang, Hanying Gu, Zhen Li, Yuanzhi Zhu, Yang Li, Guoliang Zhang, Fengbao Zhang and Xiaobin Fan\*

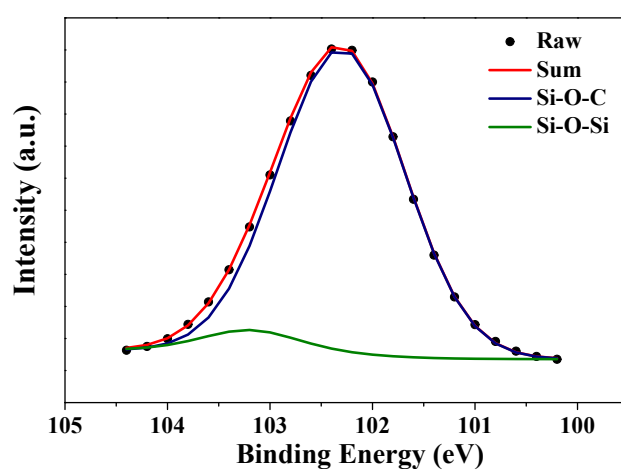

Fig. S1 Si 2p XPS spectrum of GO-AEP-UDP.

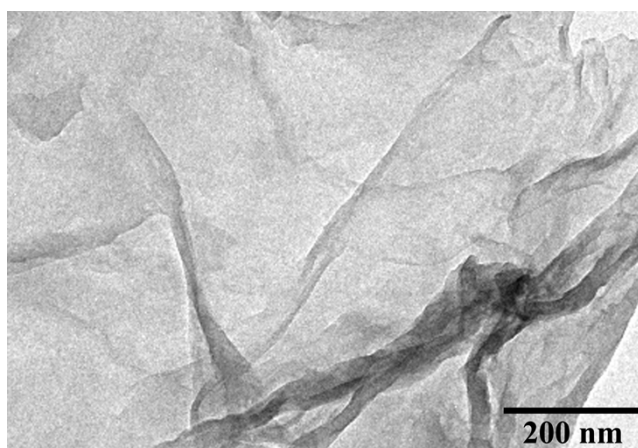

Fig. S2 HRTEM of GO-AEP-UDP

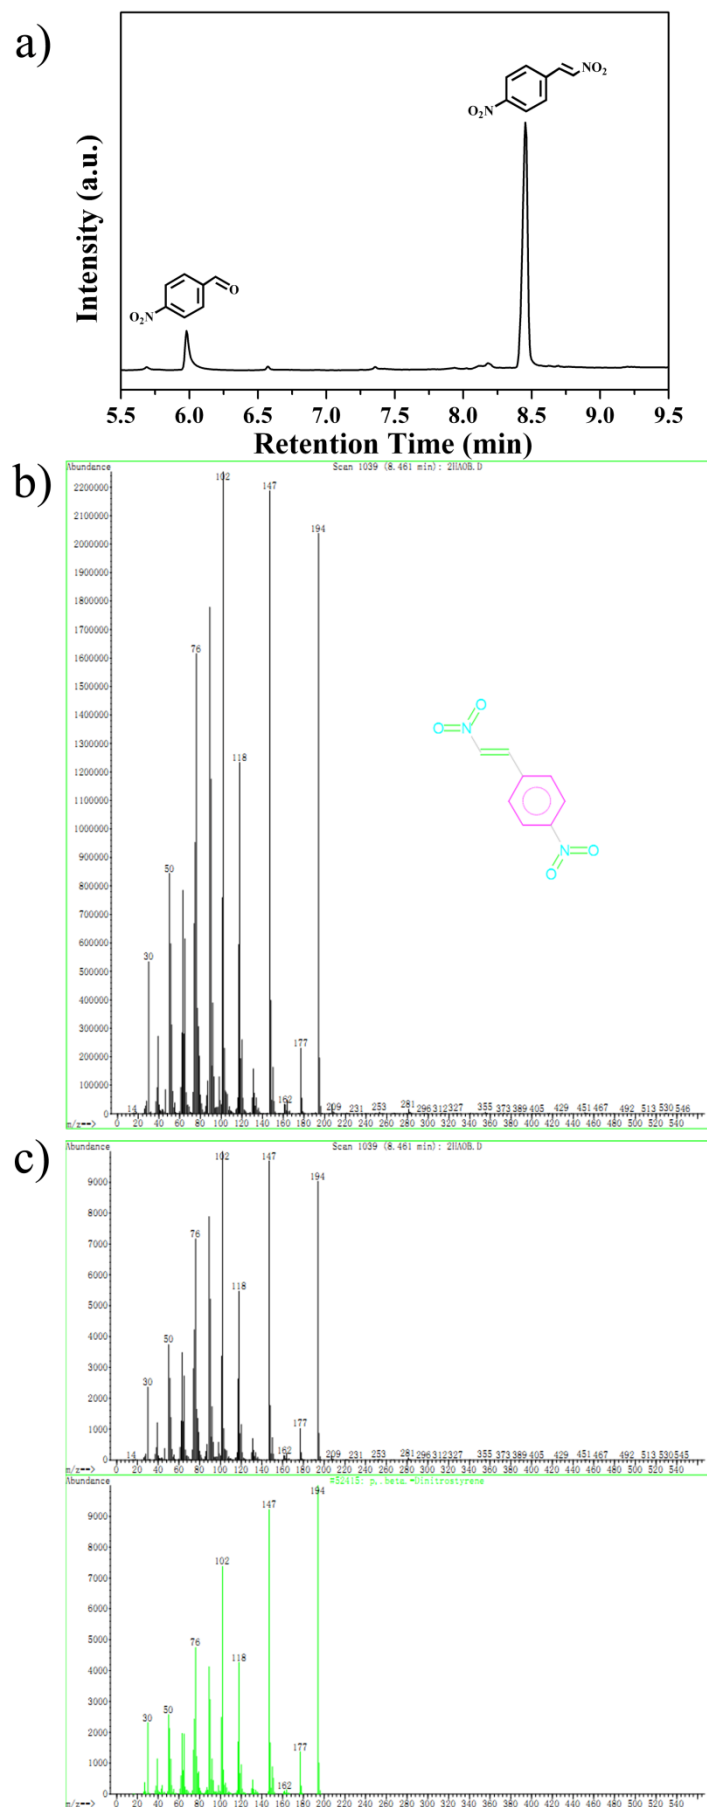

**Fig.S3** a) The GC-MS result catalyzed by GO-AEP-UDP, b) the conjecture of the product structure

by GC-MS, c) the comparison with the standard spectra.

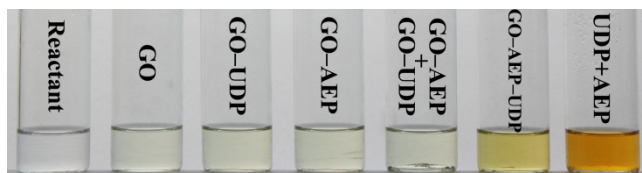

**Fig. S4** photographs of product catalyzed by various catalysts. Product color is light yellow. The GO–AEP–UDP has the best performance. In the situation of homogeneous mixture comprising UDP and AEP, product color is orange, due to a great deal of byproducts.

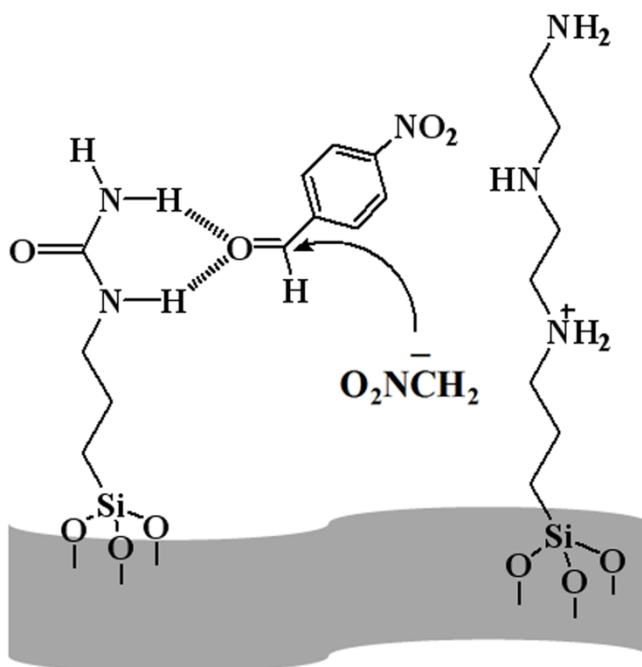

**Fig.S5** Mechanism of the catalytic reaction.
